# Supplementary material for: Vaginal Sheets with Thymbra capitata Essential Oil for the Treatment of Bacterial Vaginosis: Design, Characterization and In Vitro Evaluation of Efficacy and Safety
Source: MDPI journal article supplement (doi:10.3390/gels9040293), 2023-04-02
Supplement: s1 [file s1]

## Supplementary Materials

# Vaginal Sheets with *Thymbra capitata* Essential Oil for the Treatment of Bacterial Vaginosis: Design, Characterization and *In Vitro* Evaluation of Efficacy and Safety

Mariana Tomás <sup>1</sup>, Lúcia G. V. Sousa <sup>2,3</sup>, Ana Sofia Oliveira <sup>1</sup>, Carolina P. Gomes <sup>1</sup>, Ana Palmeira-de-Oliveira <sup>1,4</sup>, Carlos Cavaleiro <sup>5,6</sup>, Lígia Salgueiro <sup>4,6</sup>, Nuno Cerca <sup>2,3</sup>, José Martinez-de-Oliveira <sup>1</sup> and Rita Palmeira-de-Oliveira <sup>1,3,\*</sup>

### S1. Freeze drying efficiency

| Base formulation | Freeze drying efficiency (%) |
|------------------|------------------------------|
| A                | 98.5 ± 0.8                   |
| B                | 94.7 ± 1.9                   |
| C                | 97.9 ± 0.6                   |
| D                | 93.8 ± 3.0                   |
| E                | 96.4 ± 0.4                   |
| F                | 94.4 ± 1.2                   |
| G                | 96.5 ± 3.0                   |

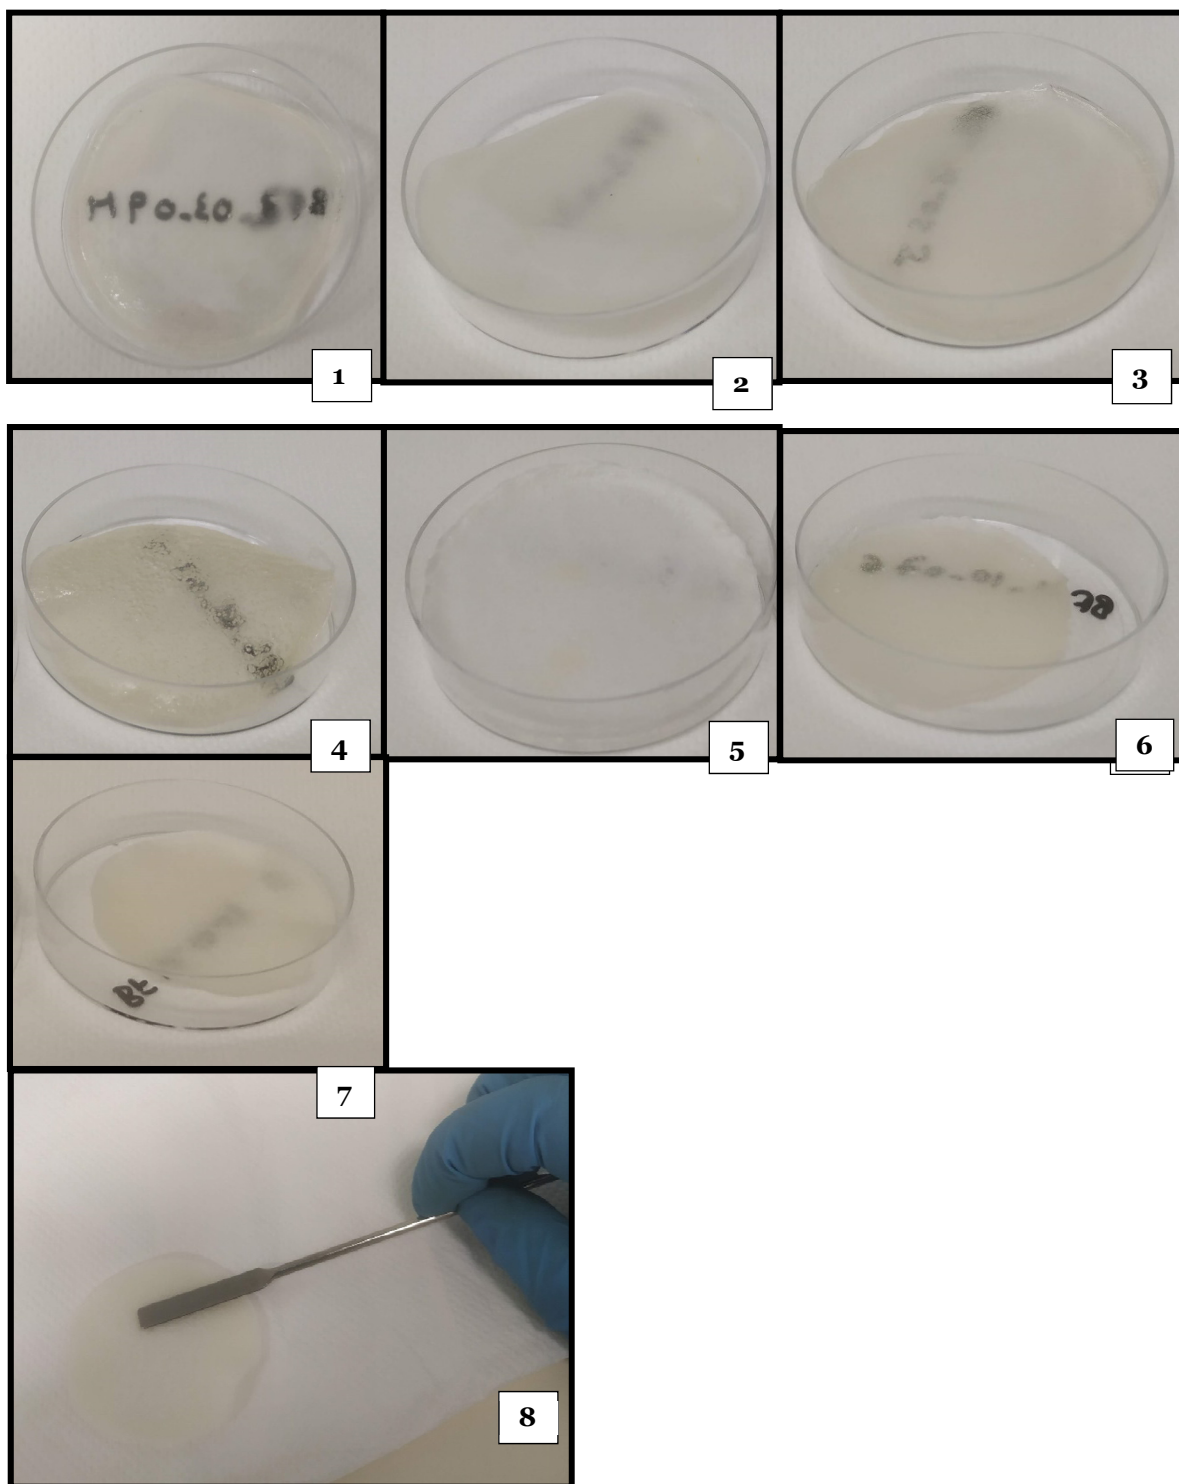

**S2.** General aspect of vaginal sheets, coating and handling. Legend: 1 – vaginal sheet A; 2 – vaginal sheet B; 3 – vaginal sheet C; 4 – vaginal sheet D; 5 – vaginal sheet E; 6 – vaginal sheet F; 7 – vaginal sheet G; 8 – Method of application/coating of TCEO on the surface of vaginal sheets after the freeze-drying process using a spatula;

**S3. Gravimetry (weight variation %) after storage for 3 months compared to t0**

| <b>Formulation</b> | <b>Variation of weight (%)</b> |             |              |
|--------------------|--------------------------------|-------------|--------------|
|                    | <b>TA</b>                      | <b>5 °C</b> | <b>40 °C</b> |
| <b>A</b>           | -1.60                          | 6.16        | -1.12        |
| <b>A.O</b>         | -1.90                          | 3.90        | -5.88        |
| <b>B</b>           | 1.35                           | 5.88        | -4.92        |
| <b>B.O</b>         | -1.18                          | 4.19        | -3.26        |
| <b>C</b>           | 1.37                           | 6.08        | -3.51        |
| <b>C.O</b>         | -0.51                          | 3.24        | -7.97        |
| <b>D</b>           | 1.29                           | 8.12        | -4.88        |
| <b>D.O</b>         | 0.30                           | 4.28        | -7.81        |
| <b>E</b>           | 2.98                           | 7.83        | -1.35        |
| <b>E.O</b>         | -0.86                          | 5.93        | -5.09        |
| <b>F</b>           | 2.55                           | 8.15        | -2.07        |
| <b>F.O</b>         | 0.60                           | 5.97        | -6.56        |
| <b>G</b>           | 0.24                           | 9.96        | -4.66        |
| <b>G.O</b>         | 0.47                           | 6.23        | -9.26        |

**S4.** pH after diluting vaginal sheets on mVFS pH 5 (1:10 w/w) after storage for 3 months.  
Results are presented as mean values  $\pm$  standard deviation (SD), n = 3.

|            | <b>pH<br/>dilution with<br/>mVFS pH5 1:10<br/>w/w<br/>pH + S.D<br/>(n=3)<br/>t0</b> | <b>pH<br/>dilution with<br/>mVFS pH5 1:10<br/>w/w<br/>pH + S.D<br/>(n=3)<br/>t3<br/>RT</b> | <b>pH<br/>dilution with<br/>mVFS pH5 1:10<br/>w/w<br/>pH + S.D<br/>(n=3)<br/>t3<br/>40°C</b> | <b>pH<br/>dilution with<br/>mVFS pH5 1:10<br/>w/w<br/>pH + S.D<br/>(n=3)<br/>t3<br/>5°C</b> |
|------------|-------------------------------------------------------------------------------------|--------------------------------------------------------------------------------------------|----------------------------------------------------------------------------------------------|---------------------------------------------------------------------------------------------|
| <b>A</b>   | 4.72 $\pm$ 0.01                                                                     | 4.78 $\pm$ 0.03                                                                            | 4.91 $\pm$ 0.02                                                                              | 4.79 $\pm$ 0.02                                                                             |
| <b>A.O</b> | 4.48 $\pm$ 0.02                                                                     | 4.62 $\pm$ 0.02                                                                            | 4.98 $\pm$ 0.01                                                                              | 4.64 $\pm$ 0.03                                                                             |
| <b>B</b>   | 4.63 $\pm$ 0.03                                                                     | 4.69 $\pm$ 0.03                                                                            | 4.97 $\pm$ 0.03                                                                              | 4.71 $\pm$ 0.01                                                                             |
| <b>B.O</b> | 4.47 $\pm$ 0.03                                                                     | 4.53 $\pm$ 0.03                                                                            | 4.89 $\pm$ 0.02                                                                              | 4.60 $\pm$ 0.01                                                                             |
| <b>C</b>   | 4.61 $\pm$ 0.01                                                                     | 4.64 $\pm$ 0.01                                                                            | 5.04 $\pm$ 0.02                                                                              | 4.69 $\pm$ 0.03                                                                             |
| <b>C.O</b> | 4.45 $\pm$ 0.01                                                                     | 4.51 $\pm$ 0.01                                                                            | 4.99 $\pm$ 0.03                                                                              | 4.61 $\pm$ 0.02                                                                             |
| <b>D</b>   | 4.67 $\pm$ 0.01                                                                     | 4.71 $\pm$ 0.01                                                                            | 4.81 $\pm$ 0.02                                                                              | 4.72 $\pm$ 0.02                                                                             |
| <b>D.O</b> | 4.52 $\pm$ 0.01                                                                     | 4.69 $\pm$ 0.02                                                                            | 4.79 $\pm$ 0.03                                                                              | 4.72 $\pm$ 0.01                                                                             |
| <b>E</b>   | 4.43 $\pm$ 0.01                                                                     | 4.54 $\pm$ 0.01                                                                            | 4.97 $\pm$ 0.01                                                                              | 4.64 $\pm$ 0.01                                                                             |
| <b>E.O</b> | 4.38 $\pm$ 0.01                                                                     | 4.49 $\pm$ 0.01                                                                            | 4.91 $\pm$ 0.01                                                                              | 4.56 $\pm$ 0.02                                                                             |
| <b>F</b>   | 4.52 $\pm$ 0.01                                                                     | 4.61 $\pm$ 0.02                                                                            | 5.02 $\pm$ 0.02                                                                              | 4.64 $\pm$ 0.02                                                                             |
| <b>F.O</b> | 4.40 $\pm$ 0.01                                                                     | 4.52 $\pm$ 0.01                                                                            | 4.92 $\pm$ 0.03                                                                              | 4.58 $\pm$ 0.01                                                                             |
| <b>G</b>   | 4.55 $\pm$ 0.01                                                                     | 4.61 $\pm$ 0.01                                                                            | 5.01 $\pm$ 0.01                                                                              | 4.65 $\pm$ 0.02                                                                             |
| <b>G.O</b> | 4.40 $\pm$ 0.02                                                                     | 4.58 $\pm$ 0.02                                                                            | 4.97 $\pm$ 0.03                                                                              | 4.64 $\pm$ 0.02                                                                             |

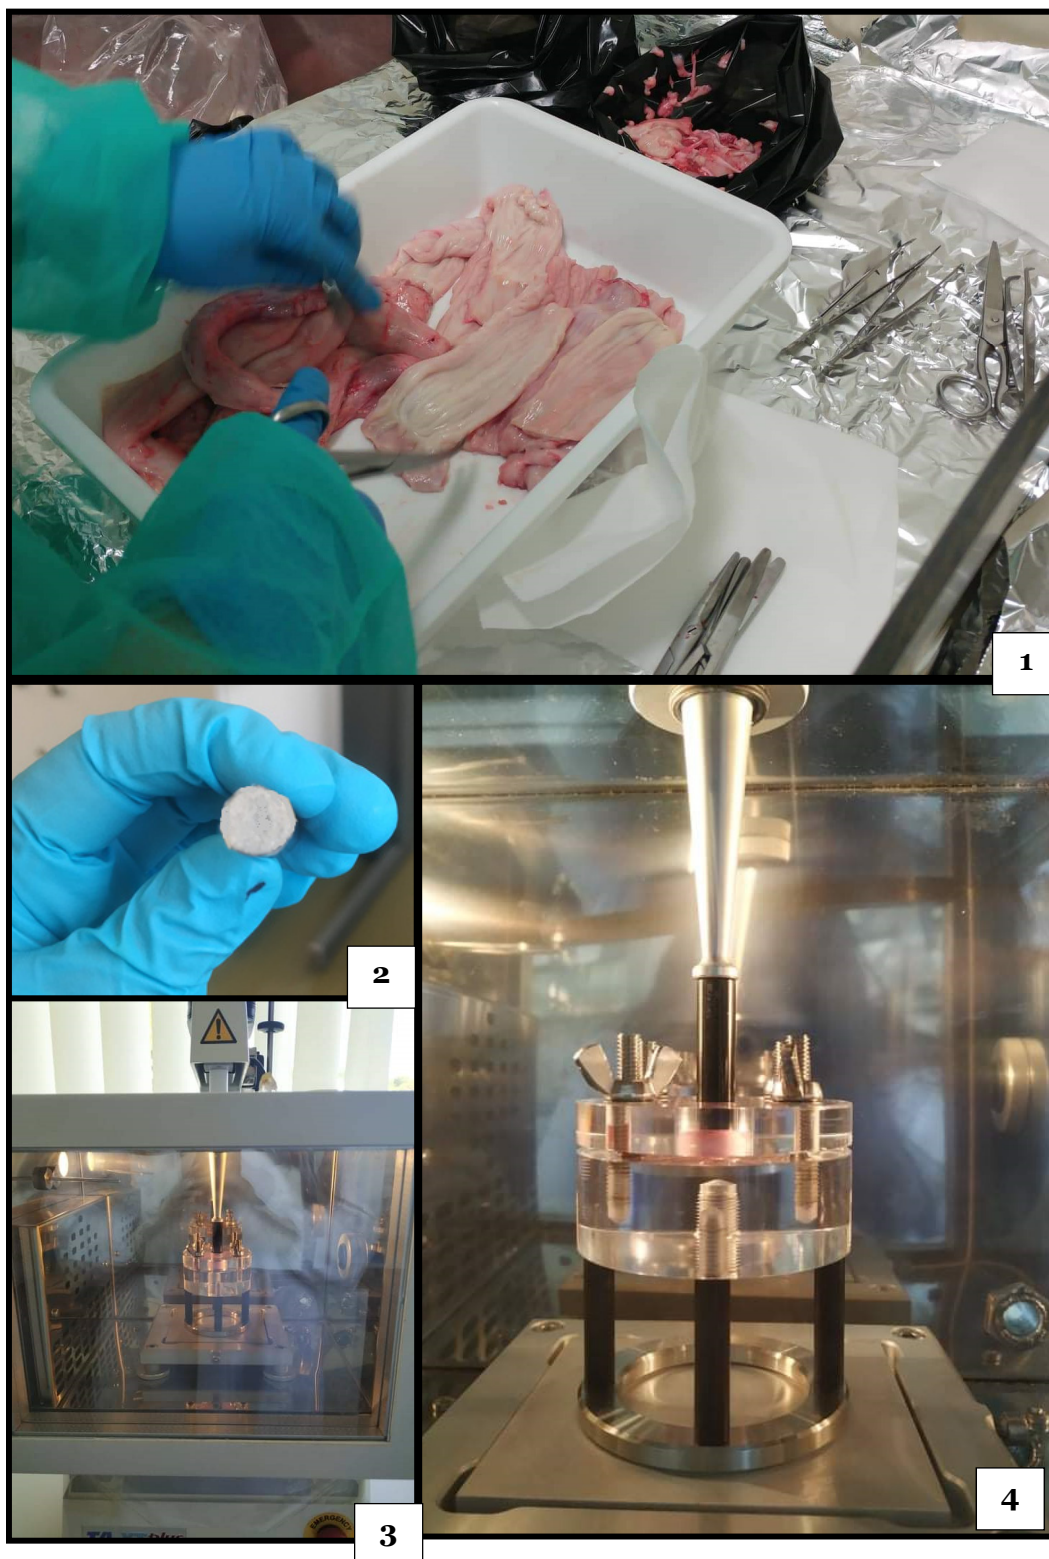

S5. Illustration of the method for evaluation of bioadhesive profile of vaginal sheets on a texturometer using *ex-vivo* porcine vaginal tissue. 1- Preparation of vaginal porcine epithelium; 2- A double sided adhesive tape allowed for circular portions of vaginal sheets attachment; 3- The whole system was maintained at 37°C by means of an oven; 4- Porcine vaginal tissue was fixed using a mucoadhesion rig (A-MUC), avoiding its movement when the probe moves and allowing intimate contact between the formulation and the epithelium.

S6. Irritation score calculation according to the endpoint at each time point

| Endpoint    | Score at time point |       |       |
|-------------|---------------------|-------|-------|
|             | 0.5 min             | 2 min | 5 min |
| Lysis       | 5                   | 3     | 1     |
| Haemorrhage | 7                   | 5     | 3     |
| Coagulation | 9                   | 7     | 5     |
